## **National Health Insurance Scheme: A pathway to a sustained access to medicine in Nigeria**

**Uguru Nkoli P.<sup>1,2,3</sup>, Ogu Udochukwu U.<sup>3</sup>, Uguru Chibuzo C.<sup>4</sup> & Ibe Ogochukwu<sup>2</sup>**

1: Department of Preventive Dentistry, Faculty of Dentistry, College of Medicine University of Nigeria Enugu Campus

2: Department of Health Administration and Management, Faculty of Health Sciences and Technology, University of Nigeria Enugu Campus

3: Health Policy Research Group, Department of Pharmaco-therapeutics, College of Medicine, University of Nigeria, Enugu Campus

4: Department of Oral and Maxillo-facial Surgery, Faculty of Dentistry, College of Medicine, University of Nigeria Enugu Campus.

### **Corresponding author:**

*Ogu Udochukwu Ugochukwu*

*udo2ogu@gmail.com*

**Word count:** 3,645

## 1 **Abstract**

2 **Objective:** The National Health Insurance Scheme (NHIS) has at its aim the need to ensure  
3 that every Nigerian has equal access to good quality health care services. So far, only the  
4 Formal Sector Social Health Insurance Program (FSSHIP) aspect of the scheme has been  
5 fully activated. The question remains, why the delay towards universal coverage?

6 **Design:** The study was a cross-sectional and mixed method design. Both qualitative and  
7 quantitative methods were utilized for the study.

8 **Setting:** This study was conducted in NHIS accredited facilities in Enugu State.

9 **Participants:** A sample of 300 enrolees were selected randomly. For the qualitative study, 6  
10 in-depth interviews (IDIs) were conducted face to face with NHIS desk officers across the  
11 three tiers of health care represented.

12 **Results:** The qualitative findings shows that 94.9% of respondents sought medical help.  
13 78.4% of the respondents indicated that the scheme improved their access to care. The  
14 qualitative finding found that there was no discrepancy in access among socio-economic  
15 groups. NHIS was reported to have improved access to medicine over the years. In the  
16 qualitative, majority of the IDI respondents stated that many of the staff in NHIS  
17 accredited facilities are not trained on what is expected or required of them with regards  
18 to the scheme.

19 **Conclusion:** A focus on accessibility, affordability and availability for the scheme means that  
20 on account of either of the three, all facility categories and their interests must be considered  
21 in further planning of the scheme to ensure that things hold up fine.

22 **Keywords:** Access to medicine, National Health Insurance Scheme, Universal Health  
23 Coverage, Nigeria.

## 24 **Article Summary**

### 25 *Strengths and Limitations*

- 26 • The study participants were only from one state.
- 27 • The study only focused on NHIS and NHIS accredited facilities.
- 28 • NHIS desk officers, hospital directors and admin officers were the focus for IDIs.

29

30

## 31 **Introduction**

32 Health is the entry point for breaking the vicious circle of ill health, poverty and under-  
33 development and transforming it to improved health status, sustainable development and  
34 prosperity (1). Countries across the world in this present time view health insurance as a  
35 means to ensure access to health care and protecting patients from financial risks (2,3). Many  
36 African countries including Nigeria has established their version of health insurance (4).

37 The National Health Insurance Scheme (NHIS) which was established with decree 35 of  
38 1999 has at its aim the need to ensure that every Nigerian has equal access to good quality  
39 health care services (2). The actual implementation of the NHIS commenced in 2002 and was  
40 consolidated in 2005 (2,5). Aspects of the scheme are; Formal Sector Social Health Insurance  
41 Program (FSSHIP), the Urban Health Self-employed Social Health Insurance Program  
42 (USSHIP) and Rural Community Social Health Insurance Program (RCSHIP), this is a  
43 community based health insurance model (5). So far, only the FSSHIP aspect of the scheme  
44 has been fully activated. The question remains, why the delay towards universal coverage?

45 Any health insurance program directed or aimed towards the benefit of the public should  
46 consider the following, availability, accessibility and affordability (6). Availability in this  
47 instance would mean the existence of adequate staff (skills-mix), drugs and equipment.  
48 According to Goudge, Gilson, Russell, Gumede and Mills (7), the shortage of health service  
49 often means that appropriate care is not available. Global health workforce alliance (GHWA)  
50 (8) posits that availability is the adequate supply and appropriate stock of health workers who  
51 have the competency and skill set to match the health needs of the population. Accessibility  
52 according to GHWA (8) involves the equitable distribution of health workers by taking into  
53 account the demographic composition of rural – urban mix and under-developed areas of the  
54 population. Affordability, according to Axene (9) is the ability to purchase a good or service.  
55 Affordability determines if a person or organization with limited resources is able to make a  
56 purchase or has sufficient income to pay for health care costs (9).

57 A longitudinal study (7) done, in South Africa on affordability, availability and acceptability  
58 barriers to health care for the chronically ill, showed that livelihood exhausted from previous  
59 illness and death, low income and limited social network prevented initial healthcare

60 consultations. On the other hand, the monthly expenditure from repeated consultation with  
61 possibility of referral to other centers and use of ambulance services was observed to be  
62 about 60% of income further hampering access (7). Thus in order to improve access to good  
63 quality healthcare, more emphasis should be placed on access to the public sector. The focus  
64 should be on improving drug supply chains, ambulance services, clinical capacity at public  
65 clinics and most importantly addressing the financial constraint faced by the socially  
66 disadvantaged. It is also imperative to think through how providers engage with patients in a  
67 way that strengthens their therapeutic alliance.

68 Rekha, Wajid, Radhakrishnan and Matthew (10) measured accessibility index using a three  
69 step floating catchment area in a geographical framework. Three variables were considered;  
70 attractiveness of health care centre, travel time or distance between the location of the service  
71 centre and residence and population demands for health care facilities.

72 Another study (11), found that respondents who described quality with regards to the ease  
73 with which they got care or short waiting time as good, are 3.9 times more likely to have  
74 private facilities as their chosen health care providing facility. Also the data collected  
75 indicated that cost for service is 2.9 times more likely to predict the use of public health  
76 facility as the usual health provider.

77 Inadequacies in quality of workforce affects improvement in health outcomes. Given that  
78 without these three, availability, accessibility and affordability together, healthcare outcomes  
79 in Nigeria will continually be poor. Despite the several failures of the Nigerian health care  
80 system, some studies suggest that if managed well, the NHIS could be a useful ground for  
81 good health care delivery (12). The purpose of this study therefore, is to emphasize the  
82 importance of or role played by access (availability, accessibility and affordability) towards  
83 the successful implementation of the NHIS (especially towards its universal coverage goals).

## 84 **Methods**

85 The study was a cross-sectional and mixed method design. Both qualitative and quantitative  
86 methods were utilized for the study.

### 87 *Study setting*

88 This study was conducted in NHIS accredited facilities in Enugu State. The state is situated in  
89 the south east part of the country with a population of 4,411,100 million with an annual  
90 population growth of 3.0 (13). The state has three senatorial zones (Enugu north, east and

91 west) with 17 local governments. In addition, there are 962 health facilities comprising 4  
92 tertiary, 148 secondary (96 private and 52 public) and 774 (492 public and 282 private)  
93 primary health facilities. The federal government funds and operates three tertiary health  
94 facilities. One tertiary facility is operated by the state (14).

#### 95 *Data collection methods*

96 A minimum sample size of 274 respondents was calculated using sample size calculation  
97 for community survey. 10% was added to accommodate non-responders thus increasing  
98 respondents surveyed to 300. Respondents were drawn from the beneficiaries of the  
99 National Health Insurance scheme which are federal civil servants in Enugu State. A  
100 sample of 300 enrolees were selected randomly. The questionnaires were interviewer  
101 administered and they contained questions eliciting information on socio-demographic  
102 details, availability of needed medicines, affordability of needed medicines, perception of  
103 quality of medicines and patient satisfaction. For the qualitative study, 6 in depth  
104 interviews (IDIs) were conducted face to face with NHIS desk officer across the three  
105 tiers of health care represented. The IDIs focused on issues regarding access to  
106 medicines. The IDI guide explored issues regarding existing governance and medicine  
107 policy within the NHIS, Supply of medicines (market forces), health information  
108 capacity, human resources, health financing and service delivery. All data collection tools  
109 were pretested before use in the study.

#### 110 *Data Analysis*

111 Analysis for quantitative data was done using STATA 11. Frequency and percentages  
112 were computed as well as test of association between dependent and independent  
113 variables. Chi-square tests were used to determine the test for associations and  
114 differences. All tests of significance were carried out at a p value  $\leq 0.05$ . Data was  
115 presented in tables, and narratives as in the result section. For qualitative analysis,  
116 interviews were transcribed verbatim. The main themes were identified from responses,  
117 coded and analysed using NVivo 11.

#### 118 *Patient and Public Involvement*

119 Those involved in the research gave verbal and signed consent.

## 120 **Results**

### 121 *Demographic characteristics*

122 296 out of 300 questionnaires were filled correctly. 67.6% were females and 32.4%.  
123 Primary beneficiaries comprised 68.2% of the respondents. 72.6% were under paid  
124 employment, 9.8% were self-employed and 6.1% were self-employed (see **Table 1**).

125

126 **Table 1: Demographic characteristics**

| Variables           | Frequency (%) |
|---------------------|---------------|
| Gender              |               |
| Male                | 96 (32.4)     |
| Female              | 200 (67.6)    |
| Total               | 296 (100.0)   |
| Primary Beneficiary |               |
| No                  | 94 (31.8)     |
| Yes                 | 202 (68.2)    |
| Total               | 296 (100.0)   |
| Employment status   |               |
| Unemployed          | 18 (6.1)      |
| Self employed       | 29 (9.8)      |
| Paid employment     | 215 (72.6)    |
| Not applicable      | 34 (11.5)     |
| Total               | 296 (100.0)   |

127

128 *Accessibility of the scheme*

129 In order to understand the level of access to medicines, respondents were asked questions  
130 on the kind of illnesses they had, and the level of access they had to medicines. 89.5% of  
131 respondents, said they had acute health issues. 94.9% of respondents sought medical  
132 help. 78.4% of the [questionnaire] respondents indicated that the scheme improved their  
133 access to care (see **Table 2**).

134 **Table 2: The kind of illness respondents sought care for and whether the scheme has**  
135 **improved their level of access**

| Variables              | Freq. (%)    |
|------------------------|--------------|
| <b>Kind of illness</b> |              |
| Acute illness          | 265 (89.5)   |
| Chronic illness        | 10.5 (100.0) |

|                                    |             |
|------------------------------------|-------------|
| Total                              | 31 (296)    |
| <b>Improved access to medicine</b> |             |
| Yes                                | 232 (78.4)  |
| No                                 | 55 (18.6)   |
| Don't know                         | 9 (3.0)     |
| Total                              | 296 (100.0) |

136

137 For the qualitative, one of the IDI respondents believed that all "enrolees had good access  
138 to medicines. A few responses of IDI respondents regarding level of access showed are  
139 as follows; "access is above average" [ETH]; *very good. You know many people are yet*  
140 *to understand the scheme but for the little I have worked here the scheme is ok."* [SL].  
141 There was no discrepancy in access among socio-economic groups. NHIS was reported  
142 to have improved access to medicine over the years; "*it has actually given room for*  
143 *people that cannot afford health care to have access to health care. It has actually tried*  
144 *to improve at least marginally it has increased it a little bit. Some people usually just*  
145 *take anything from the patent medicine vendors but now they have access medication*  
146 *without paying. It has actually improved access."*[SL].

147

#### 148 *Affordability of the scheme*

149 The study found that 82.4% of respondents indicated that costs were partly covered (See  
150 **Table 3**). However, 72.9% out of the 82.4% were under paid employment. The  
151 remaining 9.5% were either self- employed or unemployed. Socio-economically, among  
152 the 82.4% that indicated that costs were partly covered, 31.1% were among the poorest  
153 and others, 25.4, 21.1% and 21.7% for the least poor, poor and very poor respectively.  
154 82.8% of respondents indicated that medicines for treatment of common medical  
155 conditions are affordable for those with low-income (see **Table 3**).

156

157

158

159

160

161

162

163

164

165 **Table 3: Was cost covered?**

| <b>Was cost covered?</b> | <b>Frequency</b>    |                       | <b>Percent (%)</b> |              |
|--------------------------|---------------------|-----------------------|--------------------|--------------|
| Yes entirely             | 26                  |                       | 8.8                |              |
| Partly covered           | 244                 |                       | 82.4               |              |
| No                       | 26                  |                       | 8.8                |              |
| Total                    | 296                 |                       | 100.0              |              |
| <b>Employment status</b> | <b>Cost covered</b> |                       |                    |              |
|                          | <b>Yes entirely</b> | <b>Partly covered</b> | <b>No</b>          |              |
| Unemployed               | 3 (11.5%)           | 11 (4.5%)             | 4 (15.4%)          |              |
| Self employed            | 2 (7.7%)            | 27 (11.1%)            | 0                  |              |
| Paid employment          | 19 (73.1%)          | 178 (72.9%)           | 18 (69.2%)         |              |
| Not applicable           | 2 (7.7%)            | 28 (11.5%)            | 4 (15.4%)          |              |
| Total                    | 26 (100%)           | 244 (100%)            | 26 (100%)          |              |
| <b>SES</b>               | <b>COST COVERED</b> |                       |                    | <b>Total</b> |
|                          | <b>Yes entirely</b> | <b>Partly covered</b> | <b>No</b>          |              |
| The Poorest              | 12 (46.2%)          | 76 (31.2%)            | 5 (19.2%)          | 93 (31.4%)   |
| The Very Poor            | 2 (7.7%)            | 53 (21.7%)            | 7 (26.9%)          | 62 (20.9%)   |
| The Poor                 | 5 (19.2%)           | 53 (21.7%)            | 10 (38.5%)         | 68 (23.0%)   |
| The Least Poor           | 7 (26.9%)           | 62 (25.4%)            | 4 (15.4%)          | 73 (24.7%)   |
| Total                    | 26 (100%)           | 244 (100%)            | 26 (100%)          | 296 (100%)   |



| <b>Affordability of drugs for common medical conditions for low – income earners</b> | <b>Frequency</b> | <b>Percent</b> |
|--------------------------------------------------------------------------------------|------------------|----------------|
| Yes                                                                                  | 245              | 82.8           |
| No                                                                                   | 21               | 7.1            |
| Don't know                                                                           | 30               | 10.1           |
| Total                                                                                | 296              | 100.0          |

166

167 According to data collected from IDI respondents, Majority of the respondents opined  
168 that NHIS which was designed to subsidize cost of services for users of healthcare is  
169 making the private institutions run at loss; *the NHIS is structured in a way that the*  
170 *private institutions are at a loss as compared to the government institutions, because the*  
171 *government institutions have subvention from the government, the government takes care*  
172 *of their overhead while the private work out what they use. So they are already*  
173 *skewed.”[SL]. The price list of drugs presently is not anything to write home about*  
174 *because the NHIS price is very much lower than what is obtainable in the market. These*  
175 *prices are detrimental to the finance of the institution, in other words if we continue, it is*  
176 *a way of running the hospital down and the policy cannot survive for a long time because*  
177 *a lot of private hospitals will opt out”[ETH].*

178

#### 179 *Availability of the scheme*

180 78% of the respondents were of the opinion that the medicines on the scheme were of good  
181 quality (see **Table 4**). This is equally supported by findings from the IDI: *“The medicines*  
182 *provided are good ones”[AMH]. “They give quality medicine. They give the best within the*  
183 *allocated funding”[RC]. Also, 83.8% indicated the drugs are effective (see **Table 4**). These*  
184 *drugs were not always available. When asked, 47.6% of the respondents were of the opinion*  
185 *that they were not always available, while 45.6% of them believed that the drugs were always*  
186 *available (see **Table 4**). An IDI respondent believes that “it depends on the health care*  
187 *provider. I can rate it between 50 and 60% depending on the provider but it’s an individual*  
188 *access”[SL].*

189 **Table 4: Drugs from the scheme**

| <b>Quality of drugs</b>                                  | <b>Frequency</b> | <b>Percent</b> |
|----------------------------------------------------------|------------------|----------------|
| Yes                                                      | 231              | 78.0           |
| No                                                       | 33               | 11.1           |
| Don't know                                               | 32               | 10.8           |
| Total                                                    | 296              | 100.0          |
| <b>Were drugs prescribed under the scheme effective?</b> |                  |                |
| Yes                                                      | 248              | 83.8           |
| No                                                       | 35               | 11.8           |
| Don't know                                               | 13               | 4.4            |
| Total                                                    | 296              | 100.0          |
| <b>Availability of drugs issued under the scheme</b>     |                  |                |
| Yes                                                      | 135              | 45.6           |
| No                                                       | 141              | 47.6           |
| Don't know                                               | 20               | 6.8            |
| Total                                                    | 296              | 100.0          |

190

191 Staff availability for NHIS facilities were ranked low because in facilities surveyed, staff  
 192 were not readily available to attend to clients. Results showed that 65.5% indicated that they  
 193 had to wait long before receiving treatment (see **Table 5**). On the issue of difficulty in getting  
 194 medicine, 54.4% never had difficulty getting medicine, while 42.6% encountered some  
 195 difficulties getting medicine (see **Table 5**). Respondents were asked if locally made drugs  
 196 were more available on the scheme than imported medicine, 49.3% didn't know, 42.6%  
 197 indicated "yes" and 8.1% indicated "no" (see **Table 5**).

198 **Table 5: Staff availability**

| <b>Do you wait long before receiving treatment?</b> | <b>Frequency</b> | <b>Percent</b> |
|-----------------------------------------------------|------------------|----------------|
| Yes                                                 | 194              | 65.5           |
| No                                                  | 93               | 31.4           |
| Don't know                                          | 9                | 3.0            |
| Total                                               | 296              | 100.0          |
| <b>Did you have difficulty in getting medicine</b>  |                  |                |

|                                                                                         |     |       |
|-----------------------------------------------------------------------------------------|-----|-------|
| Yes                                                                                     | 126 | 42.6  |
| No                                                                                      | 161 | 54.4  |
| Don't know                                                                              | 9   | 3.0   |
| Total                                                                                   | 296 | 100.0 |
| <b>Are locally manufactured drugs more available on the scheme than imported drugs?</b> |     |       |
| Yes                                                                                     | 126 | 42.6  |
| No                                                                                      | 24  | 8.1   |
| Don't know                                                                              | 146 | 49.3  |
| Total                                                                                   | 296 | 100.0 |

199

200 On staff availability, majority of the IDI respondents stated that many of the staff in NHIS  
 201 accredited facilities are not educated on what is expected or required of them with regards to  
 202 the scheme. They have very little knowledge on how to run the scheme. This is evidenced by  
 203 the statement below: *"The desk officers are not even trained. The health care providers don't  
 204 even know what the scheme is all about... When you go to a hospital that is under NHIS, most  
 205 times the staff don't know what the scheme is all about"*.

## 206 Discussion

207 NHIS was established with the aim to reduce any negative effects of user fees and also to  
 208 help towards subsidizing the high health care expenses (15). This study sought to assess  
 209 contextual nature of NHIS with emphasis/focus on accessibility, affordability and availability  
 210 (3As) and how focus on these three can make NHIS into a more beneficial and long-term  
 211 scheme towards improving access to medicine.

212 The constraints to accessing medicines (from the supply side) focuses on healthcare service  
 213 provider/facilities (16). Among these constraints are facility/service location (17). The  
 214 scheme, has as one of its objectives, to ensure adequate distribution of health facilities within  
 215 the federation (18). This is far from realized. The implication of this to the accessibility of the  
 216 scheme, is that no matter the success recorded now by the scheme, it is still an indication of  
 217 how much more that needs to be done, especially in the area of accessibility. In order to  
 218 tackle this issue of accessibility, more facilities should be built proportionately and these  
 219 facilities across the globe, should be well equipped to handle at the very least, essential  
 220 medical services. Equally, patients should be able to access the full benefits of the scheme

221 from wherever they are within the country (irrespective of enrolment centre). Accessibility of  
222 the scheme cannot be complete without the private hospitals buying in fully into the scheme.  
223 The private hospitals are profit minded and to get them to truly buy in, their profit thirsts will  
224 have to be quenched.

225 The NHIS has improved service utilization, this finding is in congruence with other studies  
226 (19,20). However, this improvement in utilization tilts a great deal towards salaried workers  
227 of all cadre. Although it is of more benefit to low income workers. Low income workers who  
228 would have otherwise not been able to have the funds to utilize essential medical services,  
229 through the scheme, can now utilize said services. However, the percentage that fall under  
230 this group (salaried workers) are nothing compared to a vast majority of unemployed citizens  
231 living across the country, who are not able to utilize or have access to essential medical  
232 services. More needs to be done in a bid to further improve access to medicine through the  
233 scheme. NHIS was designed to cover part costs (10%) for services. Due to the rising cost of  
234 health care in the country, the NHIS sought primarily to create a means through which health  
235 care can be affordable to all (20). Thus making user fees affordable for enrollees. The 10%  
236 co-payment paid by enrollees is the individual's commitment to the scheme. This creates  
237 opportunities for low income earners to afford health care. However, since the scheme only  
238 covers salaried workers, the unemployed (those without any means of livelihood) are still left  
239 to cater for the full cost of medical services unless they have a family member who enrolls  
240 them under their own package. Despite how long the scheme has existed, it's yet to go  
241 beyond the formal sector to cover those at the community level. Total access to essential  
242 medicine is still beyond reach.

243 Availability was another subject raised during the course of this study. Availability of drugs  
244 and staff, are key factors in ensuring utilization and access to medicine (21). The drugs  
245 provided by the scheme, though of good quality, were not always available. Often times,  
246 patients/clients were sent out to the drug stores outside the facility to buy needed drugs. This  
247 sometimes meant that they sometimes had difficulty getting medicine. Which could prove a  
248 problem for patients in dire need of drugs. This challenge can be taken care by using local  
249 pharmacies to dispense drugs free of charge, against the voucher issued to the patient by the  
250 doctor. This local pharmacy, can then be reimbursed by the authorities (22). In addition to the  
251 drugs, staff were known not to be readily available. This meant that enrollees had to wait long  
252 before receiving treatment and this can often prove catastrophic for patients. Depending on  
253 the emergency of their health problems, these enrollees may grow inpatient and may decide

254 to use whatever funds they have left to seek medical care. For many of the facilities, even the  
255 available staff has no clue as to what is expected of them. In other words, they lacked  
256 adequate training needed in performance of their duties. Thus, in a manner of speaking,  
257 affecting their relationship with clients and by extension, to access to essential medicine.  
258 Therefore, if a patient suffers from a certain ailment, such patient should be able to obtain the  
259 right treatment at first call. However, seeing as staff is not always available, this will most  
260 likely not be the case (16).

261 NHIS has as its main objective achieving equitable access to health care in Nigeria (20). They  
262 key to achieving this, is a focus on the 3As that matter most - accessibility, affordability and  
263 availability (16). The results of this study has already shown what focus on these three can  
264 achieve. So far, presence of the scheme alone has been reported to increase utilization and  
265 made it a bit more affordable. However, this is not enough as majority of the country's  
266 population are unemployed and are not part of anyone's benefit package. In line with this,  
267 studies (23,24) have suggested that the organization and structure of the bio medical  
268 healthcare system of Nigeria, seems to lack in some of those basic components that could  
269 enhance access to healthcare. Obuaku (16) pointed out that there is inadequate access to  
270 health care services among a large percentage of the population and despite the reforms that  
271 has been made by the government, majority of the public health facilities are still short-  
272 staffed, ill-equipped, and low on medicines, vaccines and treatments. It has been almost two  
273 decades since the introduction of the NHIS and the number of Nigerians covered by the  
274 scheme is less than 5% of the population and these are mostly civil servants and corporate  
275 workers (and their relatives) in the private sector (25) and those without insurance, who are in  
276 need of financial risk protection (more than 90%), are expected to pay out of pocket (26).

277 Although the scheme has increased/improved utilization, by making the scheme a bit more  
278 affordable. There still remains a lot of challenges. These challenges with NHIS from the  
279 perspective of the 3As as found by this study, revolves mostly around access to drugs and  
280 availability of drugs. Especially regarding private hospitals. The low drug price, low service  
281 charge and the fact that they don't get to go by their own service charge but by that of the  
282 NHIS is considered a problem by some of the private hospitals. They believe that they are not  
283 making as much in profit as they should: instead of the hospital to be growing financially, it  
284 will be running down. If this continues, many hospitals might opt out. Also, there are cases  
285 where some of the enrollees develop resistance towards the drugs thus rendering the drugs  
286 ineffective. Equally, many of the drugs made available by the scheme have become

287 adulterated. When these clients take it, they don't actually have the desired effect. Because of  
288 it, patients tend to lose confidence in some of these orthodox medicine. There is also, the  
289 mentality that anything from overseas is better than what we produced locally. Some prefer  
290 the drugs on the high amount than the lower amount because they feel it is more genuine.  
291 These information comes from the supply side.

292 Inadequate availability can be a deterrent to the accessibility of health care. If adequate  
293 facilities, skilled staff and (quality) drugs are available and accessible but not affordable, the  
294 health services might not be used. This shows the linkage between the 3As. According to  
295 World Bank (2019), a great number of Nigeria's population still live in poverty, without  
296 adequate access to basic services, and could benefit from more inclusive development  
297 policies. Thus, affordability, in a nation like Nigeria, may be the link that holds all three  
298 together and may well be a "golden parachute" towards universal coverage. If people find  
299 health services affordable, the number of those seeking healthcare will increase, thus creating  
300 a stronger need for health services to be made available and accessible. In all, improved  
301 access. However, poor funding of healthcare in Nigeria has been a major barrier to the quality  
302 of healthcare service delivery in recent times (26). Thus, the high burden of the costs for  
303 healthcare is being borne by individuals and households, which made Nigeria rank as the  
304 country with the second highest level of out-of-pocket spending on health in the world (26).  
305 There could be a connection between the implementation of NHIS and corruption because the  
306 money meant to boost the health sector, most often, ends up in private pockets, which then  
307 results to inadequate funding to execute the programme effectively (27). Therefore,  
308 availability, accessibility and affordability are structures that can only thrive if adequate  
309 funding is released to that effect.

### 310 **Study limitations**

311 The study only focused on the health insurance scheme provided by the government. It  
312 however, did not look at other health insurance schemes that are already in play or could be  
313 in play.

### 314 **Conclusion**

315 NHIS has been reported (20,28) to contribute to an increase in health care utilization.  
316 However, the scheme is without its perks. A focus on the 3As (accessibility, affordability and  
317 availability) for the scheme means that on account of either of the three, all facility categories  
318 (private and public) and their interests (where necessary) must be considered in further

319 planning of the scheme to ensure that things hold up fine. In other to ensure a universal  
320 coverage, all health care providers (be it private or public) be addressed from their own  
321 standpoints - private as private and public as public. Not as one.

322 Finally, the 3As become a focus when the governing body of the scheme take complete  
323 charge of NHIS units in hospitals (private or public) as separate departments or liaison unit,  
324 having government employed staff (doctors, nurses, labs, equipment, attendants etc) in all  
325 these units across all facilities (private or public). For the private facilities, these staff will be  
326 answerable to and paid by the government and not the facilities they operate from. Also,  
327 quality drugs and equipment put in use in these units, in all accredited facilities across the  
328 globe. Lastly, these staff will be properly trained for the tasks they are employed to carry out.

329 **Acknowledgement:** Not applicable

330 **Ethics approval:** This study was reviewed and approved by the Health Research Ethics  
331 Committee of the University of Nigeria Teaching Hospital, Ituku-ozalla, Enugu state, Nigeria  
332 with ID number NHREC/05/01/2008B-FWA00002458-1RB00002323

333 **Funding statement:** This research received no specific grant from any funding agency in the  
334 public, commercial or not-for-profit sectors.

335 **Competing interests:** None declared.

336 **Data sharing:** Technical appendix, statistical code, and dataset available from the lead author  
337 and the corresponding author.

338 **Informed consent:** Written informed consent was obtained from all participants through  
339 signatures, thumb prints or verbally. An information sheet, detailing the purpose of the study,  
340 proposed participants, and the rights of participants, was given to the participants and  
341 reiterated verbally by the researchers.

342 **Author contributions:**

343 *Conceptualization:* [Uguru Nkolika Pamela, Ibe Ogochukwu],

344 *Methodology:* [Uguru Nkolika Pamela, Ibe, Ogochukwu],

345 *Formal analysis and investigation:* [Uguru Nkolika Pamela, Ogu Udochukwu Ugochukwu],

346 *Writing-original draft preparation:* [Uguru Nkolika Pamela, Ogu Udochukwu Ugochukwu,  
347 Uguru Chibuzo],

348 *Writing - review and editing:* [Uguru Nkolika Pamela, Ogu Udochukwu Ugochukwu, Uguru  
349 Chibuzo, Ibe Ogochukwu],

350 *Resources:* [Uguru Nkolika Pamela, Ogu Udochukwu].

351

352

353

## 354 **References**

- 355 1. Saka MJ, Isiaka SB, Akande TM, Saka AO, Agbana BE, Bako IA. Health related  
356 policy reform in Nigeria: Empirical analysis of health policies developed and  
357 implemented between 2001 to 2010 for improved sustainable health and development.  
358 *J Public Adm Policy Res.* 2012;4(3):50.
- 359 2. Akinwale AA, Shonuga A, Olusanya O. Artisan reactions to national health insurance  
360 scheme in Lagos state, Nigeria. 2014;
- 361 3. Yang W. China's new cooperative medical scheme and equity in access to health care:  
362 evidence from a longitudinal household survey. *Int J Equity Health.* 2013;12(1):20.
- 363 4. Mohammed S, Sambo MN, Dong H. Understanding client satisfaction with a health  
364 insurance scheme in Nigeria: factors and enrollees experiences. *Heal Res policy Syst.*  
365 2011;9(1):20.
- 366 5. Ewelukwa O, Onoka C, Onwujekwe O. Viewing health expenditures, payment and  
367 coping mechanisms with an equity lens in Nigeria. *BMC Health Serv Res.*  
368 2013;13(1):87.
- 369 6. McIntyre DI, Thiede M, Birch S. Access as a policy-relevant concept in low-and  
370 middle-income countries. *Heal Econ Policy Law.* 2009;4(2):179–93.
- 371 7. Goudge J, Gilson L, Russell S, Gumede T, Mills A. Affordability, availability and  
372 acceptability barriers to health care for the chronically ill: longitudinal case studies  
373 from South Africa. *BMC Health Serv Res.* 2009;9(1):75.
- 374 8. Global Health Workforce Alliance (GBHWA). WHO | What do we mean by  
375 availability, accessibility, acceptability and quality (AAAQ) of the health workforce?  
376 [Internet]. 2014 [cited 2020 May 22]. Available from:



- 377 <https://www.who.int/workforcealliance/media/qa/04/en/>
- 378 9. Axene D V. Health care affordability: a valuable concept in understanding our  
379 healthcare system challenges. *Soc Actuar Heal Sect News*. 2003;45:20–2.
- 380 10. Rekha RS, Wajid S, Radhakrishnan N, Mathew S. Accessibility analysis of health care  
381 facility using geospatial techniques. *Transp Res Procedia*. 2017;27:1163–70.
- 382 11. Uchendu OC, Ilesanmi OS, Olumide AE. Factors influencing the choice of health care  
383 providing facility among workers in a local government secretariat in south western  
384 Nigeria. *Ann Ibadan Postgrad Med*. 2013;11(2):87–95.
- 385 12. Okaro AO, Ohagwu CC, Njoku J. Awareness and perception of national health  
386 insurance scheme (NHIS) among radiographers in south east Nigeria. *Am J Sci Res*.  
387 2010;8:18–25.
- 388 13. National Population Council. National Population Estimates [Internet]. 2016.  
389 Available from:  
390 [https://www.google.com/url?sa=t&rct=j&q=&esrc=s&source=web&cd=3&ved=2ahU](https://www.google.com/url?sa=t&rct=j&q=&esrc=s&source=web&cd=3&ved=2ahUKEWj_7rbz5_ToAhUiD2MBHeLiAkIQFjACegQIBBAC&url=https%3A%2F%2Fnigerianstat.gov.ng%2Fdownload%2F474&usg=AOvVaw0BYliCMVsVxpAo4Ie9xgup)  
391 [KEWj\\_7rbz5\\_ToAhUiD2MBHeLiAkIQFjACegQIBBAC&url=https%3A%2F%2Fnige](https://www.google.com/url?sa=t&rct=j&q=&esrc=s&source=web&cd=3&ved=2ahUKEWj_7rbz5_ToAhUiD2MBHeLiAkIQFjACegQIBBAC&url=https%3A%2F%2Fnigerianstat.gov.ng%2Fdownload%2F474&usg=AOvVaw0BYliCMVsVxpAo4Ie9xgup)  
392 [rianstat.gov.ng%2Fdownload%2F474&usg=AOvVaw0BYliCMVsVxpAo4Ie9xgup](https://www.google.com/url?sa=t&rct=j&q=&esrc=s&source=web&cd=3&ved=2ahUKEWj_7rbz5_ToAhUiD2MBHeLiAkIQFjACegQIBBAC&url=https%3A%2F%2Fnigerianstat.gov.ng%2Fdownload%2F474&usg=AOvVaw0BYliCMVsVxpAo4Ie9xgup)
- 393 14. Enugu State Ministry of Health. List of Local Government Areas and Political Wards  
394 in Enugu State. Department Research Planning and Statistics. 2018.
- 395 15. Ilesanmi OS, Adebisi AO, Fatiregun AA. National health insurance scheme: how  
396 protected are households in Oyo State, Nigeria from catastrophic health expenditure?  
397 *Int J Heal policy Manag*. 2014;2(4):175.
- 398 16. Obuaku C. Essential medicines in Nigeria: foregrounding access to affordable essential  
399 medicines. *African Sociol Rev Africaine Sociol*. 2014;18(2):42–60.
- 400 17. Cameron A, Ewen M, Ross-Degnan D, Ball D, Laing R. Medicine prices, availability,  
401 and affordability in 36 developing and middle-income countries: a secondary analysis.  
402 *Lancet*. 2009;373(9659):240–9.
- 403 18. Welcome MO. The Nigerian health care system: Need for integrating adequate  
404 medical intelligence and surveillance systems. *J Pharm Bioallied Sci* [Internet]. 2011  
405 Oct;3(4):470–8. Available from: <https://pubmed.ncbi.nlm.nih.gov/22219580>

- 406 19. Price DW, Swaney III RE, Xu S, Goodspeed JR, Steiner JF. Care of common medical  
407 conditions in a managed care program for uninsured adults. *Perm J.* 2003;7(1):27.
- 408 20. Akande TM, Salaudeen A, Babatunde O. The effects of national health insurance  
409 scheme on utilization of health services at Unilorin Teaching Hospital staff clinic,  
410 Ilorin, Nigeria. 2014;
- 411 21. Pariyo GW, Ekirapa-Kiracho E, Okui O, Rahman MH, Peterson S, Bishai DM, et al.  
412 Changes in utilization of health services among poor and rural residents in Uganda: are  
413 reforms benefitting the poor? *Int J Equity Health.* 2009;8(1):39.
- 414 22. Sharma S, Chaudhury RR. Improving availability and accessibility of medicines: a tool  
415 for increasing healthcare coverage. *Arch Med.* 2015;5:12.
- 416 23. Fawibe AE, Onyedum CC, Sogaolu OM, Ajayi AO, Fasae AJ. Drug prescription  
417 pattern for asthma among nigerian doctors in general practice: A cross-sectional  
418 survey. *Ann Thorac Med.* 2012;7(2):78.
- 419 24. Alakija W. Essentials of community health, primary health care and health  
420 management. 2000;
- 421 25. Uzobo E, Ayinmoro AD. Health effects of the National Health Insurance Scheme  
422 (NHIS): A study among federal civil servants in Bayelsa State, Nigeria. *J Heal Soc  
423 Sci.* 2019;4(2):265–76.
- 424 26. Obikeze E, Onwujekwe O, Uzochukwu B, Chukwuogo O, Uchegbu E, Soludo E, et al.  
425 Benefit incidence of national health insurance scheme in enugu state, Southeast  
426 Nigeria. *African J Heal Econ.* 2013;2:13–30.
- 427 27. Oba JO. Nigeria: Yar’Adua and the resuscitation of health sector. <http://allatrica.com/stories/200806021431.html> Retrieved Oct. 2008;22:2013.
- 428
- 429 28. Sanusi RA, Awe AT. Perception of national health insurance scheme (NHIS) by health  
430 care consumers in oyo state, Nigeria. *Pakistan J Soc Sci.* 2009;6(1):48–53.

431

432
